# Supplementary material for: Cost‐Performance Analysis of Perovskite Solar Modules
Source: PubMed Central journal article supplement (PMC5238749; doi:10.1002/advs.201600269), 2016-09-15
Supplement: ADVS-4-0-s001.pdf [file ADVS-4-0-s001.pdf]

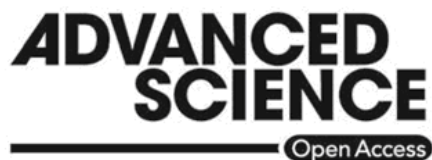

## Supporting Information

for *Adv. Sci.*, DOI: 10.1002/advs.201600269

### Cost-Performance Analysis of Perovskite Solar Modules

*Molang Cai, Yongzhen Wu, Han Chen, Xudong Yang,  
Yinghuai Qiang, and Liyuan Han\**

## Supporting Information

## Cost-performance analysis of perovskite solar modules

Molang Cai,<sup>a</sup> Yongzhen Wu,<sup>a</sup> Han Chen,<sup>b</sup> Xudong Yang<sup>b</sup>, Yinghuai Qiang<sup>c</sup> and Liyuan Han<sup>a,b\*</sup>

## Module designing and module manufacturing processes for Module A and Module B

Table S1. Designed parameters of Module A and Module B.

| module parameters                              | Module A           | Module B           |
|------------------------------------------------|--------------------|--------------------|
| module size                                    | 1m <sup>2</sup>    | 1m <sup>2</sup>    |
| distance between cells                         | 0.2cm              | 0.2mm              |
| margin areas at left and right sides of module | 0.9 cm             | 1.05cm             |
| margin areas at up and down sides of module    | 0.5 cm             | 0.5 cm             |
| size of rectangular cells                      | 1m×1cm             | 1m×1cm             |
| number of cells on one piece of module         | 82                 | 96                 |
| active area on one piece of module             | 0.81m <sup>2</sup> | 0.95m <sup>2</sup> |
| cell efficiency                                | 15% <sup>*</sup>   | 20% <sup>*</sup>   |
| module efficiency                              | 12%                | 19%                |
| power output of one piece of module            | 120W               | 190W               |

<sup>\*</sup>We assume that the cell efficiency of module A and module B are 15% and 20% respectively according to the reported highest efficiency based on full printing and high performance PSCs.

## Estimation of Module cost and Levelized cost of electricity (LCOE)

Table S2 Comparing processes of dye sensitized solar cells (DSCs) with PSCs and estimation of capital cost for Module A.

| Processes                                                    |                                                                                                                                           |
|--------------------------------------------------------------|-------------------------------------------------------------------------------------------------------------------------------------------|
| Common used in both manufacturing lines of DSSC and Module A | Substrate clean and etching, Screen printing and dip-coating, Sintering and drying, Encapsulation and sealing, Electrical interconnection |
| Only used in manufacturing line of DSSC                      | Hole drilling and sealing, Electrolyte filling and Framing, Sandwiching of electrodes                                                     |
| Only used in manufacturing line of Module A                  | Spraying operation                                                                                                                        |
| Capital investment of 50MW DSSCs production line             | 11 million US\$                                                                                                                           |
| Estimated capital investment of 100MW PSCs production line   | 11million US\$                                                                                                                            |

To assess the manufacturing line, assuming that production capacity ( $C$ ) of Module A is 100 MW. Eq. 3 presents the parameters of production capacity:

$$C = P * V * T \text{ (Eq. S1)}$$

where here  $P$  is the power output of one piece of PSCs module, based on output per square meter of 1000 W,  $P$  is defined as  $P = 1000 * \eta_{\text{module}}$  (Eq. 4), the calculated value of  $P$  (Module A) is 120W;  $T$  is the producing time by 350 days/year (504000 min/year),  $V$  is the producing rate calculated as  $100\text{MW}/(504000\text{min} * 120\text{W}/\text{m}^2) = 1.654 \text{ m}^2/\text{min}$ .

As an important factor of capacity, producing rate highly depends on the technologies used for the manufacturing line.

Since the full printing mesoporous structure is derived from DSCs, the capacity of Module A is compared with that of DSCs manufacturing line to assume capital investment of Module A. Table S2 shows that the technologies and facilities of DSCs<sup>24</sup> and Module A manufacturing line are very similar. In both cases, sintering the film to high temperature takes longer time compared to other processes as rate dominating step. This slowest sintering rate is considered as producing rate equal to the value of 1.654 m<sup>2</sup>/min calculated above. The module efficiency of DSCs is around 6%<sup>25</sup> resulting  $P$  (DSCs) of 60W/m<sup>2</sup> and  $P$ (Module A) is 120W/m<sup>2</sup>. According to Eq.S1, capacity of Module A ( $C$ (Module A)) is two times of capacity of DSCs manufacturing line ( $C$ (DSCs)) with same capital investment. Thus, estimated capital investment of 100MW Module A is 11 million US\$, which is same as that of 50MW DSSCs production line.

Table S3 Comparing processes of silicon solar cell with PSCs and estimation of capital cost for PSCs Module B.

| Processes                                                                             |                                                                                                      |
|---------------------------------------------------------------------------------------|------------------------------------------------------------------------------------------------------|
| Common used in both manufacturing lines of thin film silicon solar cells and Module B | Substrate clean and etching, Laser ablating for active layers, vacuum deposition for metal electrode |
| Only used in manufacturing line of Si thin film solar cells                           | Active layer deposition using PECVD                                                                  |
| Only used in manufacturing line of Module B                                           | Doctor blend active layers                                                                           |
| Capital investment of 60 MW Si thin film solar cell production line                   | 26 million US\$                                                                                      |
| Estimated Capital investment of 100 MW PSCs production line                           | 16 million US\$                                                                                      |

We suspect that production capacity of Module B ( $C$  (Module B)) is 100 MW to assess the manufacturing line. According to Eq. 3, producing rate of Module B ( $V$  (Module B)) is calculated as

$$100\text{MW}/(504000\text{min} * 190\text{W}/\text{m}^2) = 1.044 \text{ m}^2/\text{min}.$$

Since the planar inverted structure is derived from the thin film silicon solar cells, capacity of Module B is estimated refer to the commercial data of thin film silicon solar cell online. Table S3 compares the common processes and differences between thin film silicon solar cell and Module B. Evaporation deposition of back electrode is considered as rate dominating step in manufacturing line. The module efficiency of thin film silicon solar cells is 12% with power output of 120W/m<sup>2</sup> for silicon solar cell.<sup>20</sup> The power output of Module B is 190W, which is 1.6 times higher than thin film silicon solar cell. According to Eq. 3, the capacity of Module B is around 1.6 times to capacity of thin-film silicon solar cell manufacturing line. In addition, the costly facility PECVD is taking nearly 40% of capital investment is only used in Si thin film solar cell. Thus, the capital investment of 100MW PSCs produced by Module B is 16 million US\$, which is sum of 60% of capital investment of 60MW thin film silicon solar cell system and other equipments only used in Module B.

Table S4. Capital cost of Module A along with facility depreciation

| Year      | investment million US\$ | rate of depreciation | depreciation percentage | Capacity MW | capital cost US\$/W |
|-----------|-------------------------|----------------------|-------------------------|-------------|---------------------|
| 1st       | 11.00                   | 50%                  | 100%                    | 100         | 0.110               |
| 2nd       | 5.50                    | 50%                  | 50.0%                   | 100         | 0.055               |
| 3rd       | 2.75                    | 50%                  | 25.0%                   | 100         | 0.028               |
| 4th       | 1.38                    | 50%                  | 12.5%                   | 100         | 0.014               |
| 5th       | 0.69                    | 50%                  | 6.3%                    | 100         | 0.007               |
| after 5th | 0.69                    | -                    | -                       | 100         | 0.007               |

Table S5. Capital cost of Module B along with facility depreciation

| Year      | investment million US\$ | rate of depreciation | depreciation percentage | Capacity MW | capital cost US\$/W |
|-----------|-------------------------|----------------------|-------------------------|-------------|---------------------|
| 1st       | 16.00                   | 50%                  | 100%                    | 100         | 0.160               |
| 2nd       | 8.00                    | 50%                  | 50.0%                   | 100         | 0.080               |
| 3rd       | 4.00                    | 50%                  | 25.0%                   | 100         | 0.040               |
| 4th       | 2.00                    | 50%                  | 12.5%                   | 100         | 0.020               |
| 5th       | 1.00                    | 50%                  | 6.3%                    | 100         | 0.010               |
| after 5th | 1.00                    | -                    | -                       | 100         | 0.010               |

Capital depreciation is an important tool for businesses to recover certain capital costs over the property’s lifetime. Allowing businesses to deduct the depreciable basis over five years reduces tax liability and accelerates the rate of return on a solar investment. This has been a significant driver for the solar industry and other energy industries.

Table S6 Estimation of materials cost for Module A and Module B.

|                                             | Module A | Module B |
|---------------------------------------------|----------|----------|
| expected materials cost US\$/m <sup>2</sup> | 12.18    | 15.47    |
| materials use ratio                         | 80%      | 80%      |
| actual materials cost USD/m <sup>2</sup>    | 15.23    | 19.34    |
| module output W/m <sup>2</sup>              | 120      | 190      |
| materials USD/W                             | 0.127    | 0.102    |

A simple, but important arithmetic relationship underlies the analysis. Most PV costs are given in dollars per watt peak (US\$/W). This is fine for the end user (especially if it is a system price), but it hides the nature of the technical challenges, especially in thin films. Two components go into a cost in US\$/Wp: the output or efficiency of the device; and its manufacturing cost per unit area. By combining them you get a cost in US\$/Wp. The actual relationship is very simple: the dollars per watt cost can be found simply by dividing the manufacturing costs per unit area (say US\$/m<sup>2</sup>) by the output of the same area (which for a m<sup>2</sup> is 1000 Wp/m<sup>2</sup> times the efficiency). The same relationship works at the module level: the module cost (in US\$/module) divided by its output (Wp/module) is its US\$/Wp cost. Obviously, the same relationships show how to go the other way: if one knows the US\$/Wp cost and either the efficiency (or unit output) or the area cost, one can calculate the missing parameter. The simple relationship is as follows Eq S2:

$$\text{US\$/Wp} = (\text{Cost/unit area}) / (\text{output/unit area}). \text{ Eq. S2}$$

Unit area can be the module area; or the cost per square meter. Output per square meter is 1000 Wp/m<sup>2</sup> times the efficiency. The materials cost is calculated as following: expected materials cost divided by module output and materials use ratio, for Module A is 12.18/(120×0.8), for Module B is 15.47/(190×0.8).

Table S7. Labor cost of manufacturing line for PSCs Module A.

|          | number | Average wage<br>US\$/year | cost US\$/year |
|----------|--------|---------------------------|----------------|
| employee | 76     | 40000                     | 3040000        |
|          |        | labor cost US\$/W         | 0.0304         |

One manufacturing line requires three groups switch every 8h for one day, and one group is ready for switch on holidays. There are 15 operators in one group; 12 technicians and 4 managers to direct the operators, the number of employee is 76 in total. The labor cost is 0.0304 USD/W for year estimated in table S5. The average wage is assumed by considering the balance between developing country such as China and developed country such as USA.

Table S8 Estimated overhead cost for Module A and Module B.

| Cost component                 | PSC Module A Cost (US\$/W) | PSC Module B Cost (US\$/W) |
|--------------------------------|----------------------------|----------------------------|
| Facilities (e.g. rent)         | 0.033                      | 0.021                      |
| Utilities (electricity, water) | 0.033                      | 0.022                      |
| Labor                          | 0.0304                     | 0.0304                     |
| Maintenance                    | 0.0011                     | 0.0016                     |
| Sum                            | 0.098                      | 0.075                      |

The overhead cost is estimated by sum of facilities, utilities, labor and maintenance fee.

Table S9 Estimation of module cost for PSCs.

| Year     | capital cost<br>US\$/W | Cost of materials<br>US\$/W | overhead cost<br>US\$/W | module cost<br>US\$/W |
|----------|------------------------|-----------------------------|-------------------------|-----------------------|
| Module A | 0.025                  | 0.127                       | 0.098                   | 0.250                 |
| Module B | 0.037                  | 0.102                       | 0.075                   | 0.214                 |

The module cost is the sum of capital cost, materials cost and overhead cost for both Module A and Module B.

Table S10 Calculation of levelized cost of PSCs based on different module efficiency.

| Module efficiency  | 12%   | 15%   | 20%   |
|--------------------|-------|-------|-------|
| Module cost US\$/W | 0.25  | 0.25  | 0.25  |
| LCC                | 0.88  | 0.75  | 0.63  |
| CRF                | 0.096 | 0.096 | 0.096 |
| CF                 | 0.20  | 0.20  | 0.20  |
| OM                 | 0.001 | 0.001 | 0.001 |
| LCOE US cents/kWh  | 4.9   | 4.2   | 3.5   |

- [1] G. Smestad, C. Bignozzi, R. Argazzi, *Solar Energy Materials and Solar Cells* **1994**, 33, 253.
- [2] T.-C. Wei, S.-P. Feng, Y.-H. Chang, S.-J. Cherng, Y.-J. Lin, C.-M. Chen, H.-H. Chen, *Int. J. Electrochem. Sci* **2012**, 7, 11904.
